# Supplementary material for: Measuring health-related quality of life in sarcopenia: summary of the SarQoL psychometric properties
Source: PubMed Central journal article supplement (PMC10363087; doi:10.1007/s40520-023-02438-3), 2023-05-23
Supplement: 40520_2023_2438_MOESM1_ESM.pdf [file 40520_2023_2438_MOESM1_ESM.pdf]

# SarQoL

Sarcopenia and Quality of Life

## Quality of life in sarcopenia

This questionnaire asks about **sarcopenia**, which is a **muscle weakness that comes about with ageing**. Sarcopenia can affect your daily life. This survey will enable us to find out if the state of your muscles currently **affects your quality of life**.

Please choose the **most appropriate response** for each question. The questionnaire should take you approximately 10 minutes to complete.

### 1. Do you currently feel you have a reduction in:

|                             | A lot                    | Some                     | A little                 | None                     |
|-----------------------------|--------------------------|--------------------------|--------------------------|--------------------------|
| The strength in your arms?  | <input type="checkbox"/> | <input type="checkbox"/> | <input type="checkbox"/> | <input type="checkbox"/> |
| The strength in your legs?  | <input type="checkbox"/> | <input type="checkbox"/> | <input type="checkbox"/> | <input type="checkbox"/> |
| Your muscle mass?           | <input type="checkbox"/> | <input type="checkbox"/> | <input type="checkbox"/> | <input type="checkbox"/> |
| Your energy?                | <input type="checkbox"/> | <input type="checkbox"/> | <input type="checkbox"/> | <input type="checkbox"/> |
| Your physical capabilities? | <input type="checkbox"/> | <input type="checkbox"/> | <input type="checkbox"/> | <input type="checkbox"/> |
| Your general flexibility?   | <input type="checkbox"/> | <input type="checkbox"/> | <input type="checkbox"/> | <input type="checkbox"/> |

### 2. Do you have pain in your muscles?

Often

Sometimes

Rarely

Never

3. When undertaking **light** physical activities (walking slowly, doing the ironing, dusting, washing-up, DIY, watering the garden, etc.), do you:

|                  | Often                    | Occasionally             | Rarely                   | Never                    | I do not undertake these types of physical activities |
|------------------|--------------------------|--------------------------|--------------------------|--------------------------|-------------------------------------------------------|
| Have difficulty? | <input type="checkbox"/> | <input type="checkbox"/> | <input type="checkbox"/> | <input type="checkbox"/> | <input type="checkbox"/>                              |
| Get tired?       | <input type="checkbox"/> | <input type="checkbox"/> | <input type="checkbox"/> | <input type="checkbox"/> | <input type="checkbox"/>                              |
| Experience pain? | <input type="checkbox"/> | <input type="checkbox"/> | <input type="checkbox"/> | <input type="checkbox"/> | <input type="checkbox"/>                              |

4. When undertaking **moderate** physical activities (fast walking, cleaning windows, hoovering, washing the car, pulling up weeds in the garden, etc.), do you:

|                  | Often                    | Occasionally             | Rarely                   | Never                    | I do not undertake these types of physical activities |
|------------------|--------------------------|--------------------------|--------------------------|--------------------------|-------------------------------------------------------|
| Have difficulty? | <input type="checkbox"/> | <input type="checkbox"/> | <input type="checkbox"/> | <input type="checkbox"/> | <input type="checkbox"/>                              |
| Get tired?       | <input type="checkbox"/> | <input type="checkbox"/> | <input type="checkbox"/> | <input type="checkbox"/> | <input type="checkbox"/>                              |
| Experience pain? | <input type="checkbox"/> | <input type="checkbox"/> | <input type="checkbox"/> | <input type="checkbox"/> | <input type="checkbox"/>                              |

5. When undertaking **intense** physical activities (running, hiking, lifting heavy objects, moving furniture, digging the garden, etc.), do you:

|                  | Often                    | Occasionally             | Rarely                   | Never                    | I do not undertake these types of physical activities |
|------------------|--------------------------|--------------------------|--------------------------|--------------------------|-------------------------------------------------------|
| Have difficulty? | <input type="checkbox"/> | <input type="checkbox"/> | <input type="checkbox"/> | <input type="checkbox"/> | <input type="checkbox"/>                              |
| Get tired?       | <input type="checkbox"/> | <input type="checkbox"/> | <input type="checkbox"/> | <input type="checkbox"/> | <input type="checkbox"/>                              |
| Experience pain? | <input type="checkbox"/> | <input type="checkbox"/> | <input type="checkbox"/> | <input type="checkbox"/> | <input type="checkbox"/>                              |

6. Do you currently feel old?

- Yes, very
- Yes, somewhat
- Yes, a little
- No, not at all

**7.** If yes to question 6, what gives you that impression?

(Choose as many answers as you like)

I become unwell easily

I take many medications

I feel a weakness in my muscles

I have problems with my memory

I've had to face the death of several people close to me

I do not have much energy, I am often tired

My eyesight is poor

Other:

**8.** Do you feel physically weak?

Yes, completely

Yes, somewhat

Yes, a little

No, not at all

**9.** Do you feel you are limited in:

|                                      | A lot                    | Some                     | A little                 | None                     |
|--------------------------------------|--------------------------|--------------------------|--------------------------|--------------------------|
| The length of time you can walk for? | <input type="checkbox"/> | <input type="checkbox"/> | <input type="checkbox"/> | <input type="checkbox"/> |
| How often you go out walking?        | <input type="checkbox"/> | <input type="checkbox"/> | <input type="checkbox"/> | <input type="checkbox"/> |
| The distance you can walk?           | <input type="checkbox"/> | <input type="checkbox"/> | <input type="checkbox"/> | <input type="checkbox"/> |
| The speed at which you can walk?     | <input type="checkbox"/> | <input type="checkbox"/> | <input type="checkbox"/> | <input type="checkbox"/> |
| The length of your steps?            | <input type="checkbox"/> | <input type="checkbox"/> | <input type="checkbox"/> | <input type="checkbox"/> |

**10.** When you are walking:

|                                                       | Often                    | Occasionally             | Rarely                   | Never                    | I am unable to walk      |
|-------------------------------------------------------|--------------------------|--------------------------|--------------------------|--------------------------|--------------------------|
| Do you feel very tired?                               | <input type="checkbox"/> | <input type="checkbox"/> | <input type="checkbox"/> | <input type="checkbox"/> | <input type="checkbox"/> |
| Do you need to sit down regularly to recover?         | <input type="checkbox"/> | <input type="checkbox"/> | <input type="checkbox"/> | <input type="checkbox"/> | <input type="checkbox"/> |
| Do you have difficulty crossing roads quickly enough? | <input type="checkbox"/> | <input type="checkbox"/> | <input type="checkbox"/> | <input type="checkbox"/> | <input type="checkbox"/> |
| Do you have difficulties with uneven surfaces?        | <input type="checkbox"/> | <input type="checkbox"/> | <input type="checkbox"/> | <input type="checkbox"/> | <input type="checkbox"/> |

11. Do you have problems with your balance?

Often

---

Occasionally

---

Rarely

---

Never

---

12. How often do you fall?

Very often

---

Occasionally

---

Rarely

---

Never

---

13. Do you think that your physical appearance has changed?

Yes, very

---

Yes, somewhat

---

Yes, a little

---

No, not at all

---

14. If yes to question 13, in what way? (Choose as many answers as you like)

Change in your weight (you've put on weight or you've lost weight)

---

Appearance of wrinkles

---

Loss of height

---

Loss of muscle mass

---

Hair loss

---

Getting white or grey hair

---

Other:

---

15. If yes to question 13, are you upset by this change?

Yes, very

---

Yes, somewhat

---

Yes, a little

---

No, not at all

---

16. Do you feel frail?

- Very much so
- A little
- Not at all

17. Do you currently have difficulty in undertaking any of the following daily activities:

|                                                                                               | Unable to do             | Great difficulty         | A little difficulty      | No difficulty            | Not applicable           |
|-----------------------------------------------------------------------------------------------|--------------------------|--------------------------|--------------------------|--------------------------|--------------------------|
| Climbing a flight of stairs?                                                                  | <input type="checkbox"/> | <input type="checkbox"/> | <input type="checkbox"/> | <input type="checkbox"/> | <input type="checkbox"/> |
| Climbing several flights of stairs?                                                           | <input type="checkbox"/> | <input type="checkbox"/> | <input type="checkbox"/> | <input type="checkbox"/> | <input type="checkbox"/> |
| Going up one or several steps without holding on to the banister?                             | <input type="checkbox"/> | <input type="checkbox"/> | <input type="checkbox"/> | <input type="checkbox"/> | <input type="checkbox"/> |
| Squatting or kneeling?                                                                        | <input type="checkbox"/> | <input type="checkbox"/> | <input type="checkbox"/> | <input type="checkbox"/> | <input type="checkbox"/> |
| Stooping or leaning down to pick up an object off the floor?                                  | <input type="checkbox"/> | <input type="checkbox"/> | <input type="checkbox"/> | <input type="checkbox"/> | <input type="checkbox"/> |
| Getting up from the floor without holding on to anything?                                     | <input type="checkbox"/> | <input type="checkbox"/> | <input type="checkbox"/> | <input type="checkbox"/> | <input type="checkbox"/> |
| Getting out of a low chair without armrests?                                                  | <input type="checkbox"/> | <input type="checkbox"/> | <input type="checkbox"/> | <input type="checkbox"/> | <input type="checkbox"/> |
| Moving, generally, from a sitting position to a standing position?                            | <input type="checkbox"/> | <input type="checkbox"/> | <input type="checkbox"/> | <input type="checkbox"/> | <input type="checkbox"/> |
| Carrying heavy objects (large bags full of shopping, saucepan filled with water, etc.)?       | <input type="checkbox"/> | <input type="checkbox"/> | <input type="checkbox"/> | <input type="checkbox"/> | <input type="checkbox"/> |
| Opening a bottle or a jar?                                                                    | <input type="checkbox"/> | <input type="checkbox"/> | <input type="checkbox"/> | <input type="checkbox"/> | <input type="checkbox"/> |
| Using public transport?                                                                       | <input type="checkbox"/> | <input type="checkbox"/> | <input type="checkbox"/> | <input type="checkbox"/> | <input type="checkbox"/> |
| Getting in or out of a car?                                                                   | <input type="checkbox"/> | <input type="checkbox"/> | <input type="checkbox"/> | <input type="checkbox"/> | <input type="checkbox"/> |
| Doing your shopping?                                                                          | <input type="checkbox"/> | <input type="checkbox"/> | <input type="checkbox"/> | <input type="checkbox"/> | <input type="checkbox"/> |
| Doing the housework (making the bed, hoovering, doing the ironing, washing the dishes, etc.)? | <input type="checkbox"/> | <input type="checkbox"/> | <input type="checkbox"/> | <input type="checkbox"/> | <input type="checkbox"/> |

18. Does your muscle weakness limit your movement?

Yes, a lot

---

Yes, somewhat

---

Yes, a little

---

No, not at all

---

19. If yes to question 18, for what reasons? (Choose as many answers as you like)

Fear of pain

---

Fear that you might not be able to

---

Fear of feeling tired after these activities

---

Fear of falling

---

Other:

---

20. Does your muscle weakness limit your sex life?

I am not sexually active

---

Yes, completely

---

Yes, somewhat

---

Yes, a little

---

No, not at all

---

21. How has your participation in physical activities/sport changed?

Increased

---

Decreased

---

Unchanged

---

I have never participated in physical activities or sports

---

22. How has your participation in leisure activities (going out to eat, gardening, doing DIY, shooting/fishing, senior citizens clubs, playing bridge, going for a walk, etc.) changed?

Increased

---

Decreased

---

Unchanged

---

I have never participated in leisure activities

---
